# Supplementary material for: Water-induced reversible structural phase transformation with chromotropism in metal supramolecular frameworks containing aminopyrazine and sulfate anions
Source: Royal Society of Chemistry journal article supplement (doi:10.1039/c002556a), 2010-01-01
Supplement: c002556a.pdf [file c002556a.pdf]

# **Water-Induced Reversible Structural Phase Transformation with Chromotropism in Metal Supramolecular Frameworks Containing Aminopyrazine and Sulfate Anions**

*Jaurusup Boonmak,<sup>a</sup> Motohiro Nakano,<sup>b</sup> Narongsak Chaichit,<sup>c</sup> Chaveng Pakawatchai,<sup>d</sup>*

*and Sujitra Youngme,<sup>\*,a</sup>*

\* Correspondence author: E-mail: [sujitra@kku.ac.th](mailto:sujitra@kku.ac.th); fax: +66-43-202-373.

<sup>a</sup> Khon Kaen University.

<sup>b</sup> Osaka University.

<sup>c</sup> Thammasat University Rangsit.

<sup>d</sup> Prince of Songkla University.

**Table S1.** Selected bond lengths (Å) and angles (deg) for compounds **1–4**.

| Compound 1 <sup>a</sup>              |            |                                        |            |
|--------------------------------------|------------|----------------------------------------|------------|
| Co1–O9                               | 2.0436(12) | Co2–O3                                 | 2.0691(14) |
| Co1–O9 <sup>i</sup>                  | 2.0436(12) | Co2–O3 <sup>ii</sup>                   | 2.0691(14) |
| Co1–O1 <sup>i</sup>                  | 2.0968(13) | Co2–O2 <sup>ii</sup>                   | 2.1030(14) |
| Co1–O1                               | 2.0968(13) | Co2–O2                                 | 2.1030(14) |
| Co1–N1 <sup>i</sup>                  | 2.2071(16) | Co2–O4 <sup>ii</sup>                   | 2.1113(15) |
| Co1–N1                               | 2.2071(15) | Co2–O4                                 | 2.1113(15) |
| O9–Co1–O9 <sup>i</sup>               | 180        | O3–Co2–O3 <sup>ii</sup>                | 180        |
| O9–Co1–O1 <sup>i</sup>               | 92.49(5)   | O3–Co2–O2 <sup>ii</sup>                | 91.09(6)   |
| O9 <sup>i</sup> –Co1–O1 <sup>i</sup> | 87.51(5)   | O3 <sup>ii</sup> –Co2–O2 <sup>ii</sup> | 88.91(6)   |
| O9–Co1–O1                            | 87.51(5)   | O3–Co2–O2                              | 88.91(6)   |
| O9 <sup>i</sup> –Co1–O1              | 92.49(5)   | O3 <sup>ii</sup> –Co2–O2               | 91.09(6)   |
| O1 <sup>i</sup> –Co1–O1              | 180        | O2 <sup>ii</sup> –Co2–O2               | 180        |
| O9–Co1–N1 <sup>i</sup>               | 88.62(5)   | O3–Co2–O4 <sup>ii</sup>                | 87.33(7)   |
| O9 <sup>i</sup> –Co1–N1 <sup>i</sup> | 91.38(5)   | O3 <sup>ii</sup> –Co2–O4 <sup>ii</sup> | 92.67(7)   |
| O1 <sup>i</sup> –Co1–N1 <sup>i</sup> | 89.83(6)   | O2 <sup>ii</sup> –Co2–O4 <sup>ii</sup> | 90.06(6)   |
| O1–Co1–N1 <sup>i</sup>               | 90.17(6)   | O2–Co2–O4 <sup>ii</sup>                | 89.94(6)   |
| O9–Co1–N1                            | 91.38(5)   | O3–Co2–O4                              | 92.67(7)   |
| O9 <sup>i</sup> –Co1–N1              | 88.62(5)   | O3 <sup>ii</sup> –Co2–O4               | 87.33(7)   |
| O1 <sup>i</sup> –Co1–N1              | 90.17(6)   | O2 <sup>ii</sup> –Co2–O4               | 89.94(6)   |
| O1–Co1–N1                            | 89.83(6)   | O2–Co2–O4                              | 90.06(6)   |
| N1 <sup>i</sup> –Co1–N1              | 180        | O4 <sup>ii</sup> –Co2–O4               | 180        |
| Compound 2 <sup>a</sup>              |            |                                        |            |
| Fe1–O9 <sup>i</sup>                  | 2.0867(13) | Fe2–O3                                 | 2.1070(15) |
| Fe1–O9                               | 2.0867(13) | Fe2–O3 <sup>ii</sup>                   | 2.1070(15) |

|                                      |            |                                        |            |
|--------------------------------------|------------|----------------------------------------|------------|
| Fe1–O1 <sup>i</sup>                  | 2.0977(12) | Fe2–O2 <sup>ii</sup>                   | 2.1139(14) |
| Fe1–O1                               | 2.0977(12) | Fe2–O2                                 | 2.1139(14) |
| Fe1–N1 <sup>i</sup>                  | 2.2492(15) | Fe2–O4 <sup>ii</sup>                   | 2.1522(14) |
| Fe1–N1                               | 2.2492(15) | Fe2–O4                                 | 2.1522(14) |
| O9 <sup>i</sup> –Fe1–O9              | 180        | O3–Fe2–O3 <sup>ii</sup>                | 180        |
| O9 <sup>i</sup> –Fe1–O1 <sup>i</sup> | 87.44(6)   | O3–Fe2–O2 <sup>ii</sup>                | 90.47(6)   |
| O9–Fe1–O1 <sup>i</sup>               | 92.56(6)   | O3 <sup>ii</sup> –Fe2–O2 <sup>ii</sup> | 89.53(6)   |
| O9 <sup>i</sup> –Fe1–O1              | 92.56(6)   | O3–Fe2–O2                              | 89.53(6)   |
| O9–Fe1–O1                            | 87.44(6)   | O3 <sup>ii</sup> –Fe2–O2               | 90.47(6)   |
| O1 <sup>i</sup> –Fe1–O1              | 180        | O2 <sup>ii</sup> –Fe2–O2               | 180        |
| O9 <sup>i</sup> –Fe1–N1 <sup>i</sup> | 92.22(5)   | O3–Fe2–O4 <sup>ii</sup>                | 86.15(6)   |
| O9–Fe1–N1 <sup>i</sup>               | 87.78(5)   | O3 <sup>ii</sup> –Fe2–O4 <sup>ii</sup> | 93.85(6)   |
| O1 <sup>i</sup> –Fe1–N1 <sup>i</sup> | 88.56(6)   | O2 <sup>ii</sup> –Fe2–O4 <sup>ii</sup> | 89.65(6)   |
| O1–Fe1–N1 <sup>i</sup>               | 91.44(6)   | O2–Fe2–O4 <sup>ii</sup>                | 90.35(6)   |
| O9 <sup>i</sup> –Fe1–N1              | 87.78(5)   | O3–Fe2–O4                              | 93.85(6)   |
| O9–Fe1–N1                            | 92.22(5)   | O3 <sup>ii</sup> –Fe2–O4               | 86.15(6)   |
| O1 <sup>i</sup> –Fe1–N1              | 91.44(6)   | O2 <sup>ii</sup> –Fe2–O4               | 90.35(6)   |
| O1–Fe1–N1                            | 88.56(6)   | O2–Fe2–O4                              | 89.65(6)   |
| N1 <sup>i</sup> –Fe1–N1              | 180        | O4 <sup>ii</sup> –Fe2–O4               | 180        |
| Compound 3 <sup>a</sup>              |            |                                        |            |
| Co1–O9 <sup>i</sup>                  | 2.0596(13) | Fe1–O3 <sup>ii</sup>                   | 2.0904(15) |
| Co1–O9                               | 2.0596(13) | Fe1–O3                                 | 2.0904(15) |
| Co1–O1 <sup>i</sup>                  | 2.0974(13) | Fe1–O2                                 | 2.1116(15) |
| Co1–O1                               | 2.0974(13) | Fe1–O2 <sup>ii</sup>                   | 2.1116(14) |
| Co1–N1                               | 2.2237(14) | Fe1–O4 <sup>ii</sup>                   | 2.1375(15) |
| Co1–N1 <sup>i</sup>                  | 2.2237(14) | Fe1–O4                                 | 2.1375(15) |
| O9 <sup>i</sup> –Co1–O9              | 180        | O3 <sup>ii</sup> –Fe1–O3               | 180        |

|                                       |           |                                        |           |
|---------------------------------------|-----------|----------------------------------------|-----------|
| O9 <sup>i</sup> -Co1-O1 <sup>i</sup>  | 87.47(6)  | O3 <sup>ii</sup> -Fe1-O2               | 90.71(6)  |
| O9-Co1-O1 <sup>i</sup>                | 92.53(6)  | O3-Fe1-O2                              | 89.29(6)  |
| O9 <sup>i</sup> -Co1-O1               | 92.53(6)  | O3 <sup>ii</sup> -Fe1-O2 <sup>ii</sup> | 89.29(6)  |
| O9-Co1-O1                             | 87.47(6)  | O3-Fe1-O2 <sup>ii</sup>                | 90.71(6)  |
| O1 <sup>i</sup> -Co1-O1               | 180       | O2-Fe1-O2 <sup>ii</sup>                | 180       |
| O9 <sup>i</sup> -Co1-N1               | 88.30(5)  | O3 <sup>ii</sup> -Fe1-O4 <sup>ii</sup> | 93.39(7)  |
| O9-Co1-N1                             | 91.70(5)  | O3-Fe1-O4 <sup>ii</sup>                | 86.61(7)  |
| O1 <sup>i</sup> -Co1-N1               | 90.60(6)  | O2-Fe1-O4 <sup>ii</sup>                | 90.19(6)  |
| O1-Co1-N1                             | 89.40(6)  | O2 <sup>ii</sup> -Fe1-O4 <sup>ii</sup> | 89.81(6)  |
| O9 <sup>i</sup> -Co1-N1 <sup>i</sup>  | 91.70(5)  | O3 <sup>ii</sup> -Fe1-O4               | 86.61(7)  |
| O9-Co1-N1 <sup>i</sup>                | 88.30(5)  | O3-Fe1-O4                              | 93.39(7)  |
| O1 <sup>i</sup> -Co1-N1 <sup>i</sup>  | 89.40(6)  | O2-Fe1-O4                              | 89.81(6)  |
| O1-Co1-N1 <sup>i</sup>                | 90.60(6)  | O2 <sup>ii</sup> -Fe1-O4               | 90.19(6)  |
| N1-Co1-N1 <sup>i</sup>                | 180       | O4 <sup>ii</sup> -Fe1-O4               | 180       |
| Compound 4 <sup>b</sup>               |           |                                        |           |
| Cd1-O2 <sup>i</sup>                   | 2.297(5)  | Cd1-N1 <sup>ii</sup>                   | 2.315(4)  |
| Cd1-O4                                | 2.303(6)  | Cd1-O2                                 | 2.587(5)  |
| Cd1-N1                                | 2.315(4)  | O2-Cd1 <sup>i</sup>                    | 2.297(5)  |
| O2 <sup>i</sup> -Cd1-O4               | 165.5(2)  | O2 <sup>i</sup> -Cd1-O2                | 68.7(2)   |
| O2 <sup>i</sup> -Cd1-N1               | 91.0(1)   | O4-Cd1-O2                              | 125.8(2)  |
| O4-Cd1-N1                             | 90.55(10) | N1-Cd1-O2                              | 84.68(10) |
| O2 <sup>i</sup> -Cd1-N1 <sup>ii</sup> | 91.0(1)   | N1 <sup>ii</sup> -Cd1-O2               | 84.68(10) |
| O4-Cd1-N1 <sup>ii</sup>               | 90.55(10) | Cd1 <sup>i</sup> -O2-Cd1               | 111.3(2)  |
| N1-Cd1-N1 <sup>ii</sup>               | 167.6(2)  |                                        |           |

<sup>a</sup> Symmetry codes for **1-3**: (i)  $-x, 1-y, 1-z$ ; (ii)  $-x, 2-y, -z$ . <sup>b</sup>For **4**: (i)  $1-x, -y, 1-z$ ; (ii)  $x, -y, z$ .

**Table S2.** Intermolecular hydrogen bonds for compounds **1–4**.

| D–H...A                        | H...A/Å | D...A /Å | D–H...A /° |
|--------------------------------|---------|----------|------------|
| Compound <b>1</b> <sup>a</sup> |         |          |            |
| O1–H1A...O6 <sup>i</sup>       | 1.84    | 2.764(2) | 169        |
| O1–H1B...O7 <sup>ii</sup>      | 1.88    | 2.771(2) | 162        |
| O2–H2A...O8 <sup>iii</sup>     | 1.79    | 2.733(2) | 172        |
| O2–H2B...O7                    | 1.87    | 2.815(2) | 171        |
| N3–H3A...O6 <sup>iv</sup>      | 2.19    | 3.034(2) | 169        |
| N3–H3B...O3 <sup>v</sup>       | 2.61    | 3.347(3) | 145        |
| N3–H3B...O4 <sup>ii</sup>      | 2.52    | 3.277(2) | 147        |
| O3–H3C...O10 <sup>vi</sup>     | 1.81    | 2.732(2) | 167        |
| O3–H3D...O5 <sup>vii</sup>     | 1.81    | 2.739(2) | 171        |
| O4–H4A...O5                    | 1.80    | 2.741(2) | 172        |
| O4–H4B...O10 <sup>viii</sup>   | 1.85    | 2.780(2) | 167        |
| O9–H9...N2 <sup>viii</sup>     | 1.86    | 2.792(2) | 173        |
| O9–H9A...O6                    | 1.83    | 2.755(2) | 169        |
| O10–H10...O7                   | 1.84    | 2.779(2) | 169        |
| O10–H10A...O8 <sup>vi</sup>    | 1.78    | 2.704(2) | 165        |
| Compound <b>2</b> <sup>a</sup> |         |          |            |
| O1–H1A...O6 <sup>i</sup>       | 1.87    | 2.748(2) | 170        |
| O1–H1B...O7 <sup>ii</sup>      | 1.88    | 2.760(2) | 174        |
| O2–H2A...O8 <sup>iii</sup>     | 1.81    | 2.725(2) | 170        |
| O2–H2B...O7                    | 1.90    | 2.811(2) | 167        |
| N3–H3A...O6 <sup>iv</sup>      | 2.18    | 3.030(2) | 169        |
| N3–H3B...O3 <sup>v</sup>       | 2.57    | 3.312(3) | 145        |
| N3–H3B...O4 <sup>ii</sup>      | 2.54    | 3.283(2) | 147        |
| O3–H3C...O10 <sup>vi</sup>     | 1.83    | 2.728(2) | 168        |
| O3–H3D...O5 <sup>vii</sup>     | 1.84    | 2.735(2) | 168        |
| O4–H4A...O5                    | 1.85    | 2.739(2) | 167        |

|                                |      |           |     |
|--------------------------------|------|-----------|-----|
| O4–H4B...O10 <sup>viii</sup>   | 1.88 | 2.780(2)  | 164 |
| O9–H9...N2 <sup>viii</sup>     | 1.88 | 2.790(2)  | 171 |
| O9–H9A...O6                    | 1.91 | 2.775(2)  | 167 |
| O10–H10...O7                   | 1.86 | 2.787(2)  | 171 |
| O10–H10A...O8 <sup>vi</sup>    | 1.78 | 2.700(2)  | 167 |
| Compound <b>3</b> <sup>a</sup> |      |           |     |
| O1–H1A...O6 <sup>i</sup>       | 1.87 | 2.758(2)  | 170 |
| O1–H1B...O7 <sup>ii</sup>      | 1.9  | 2.769(2)  | 171 |
| O2–H2A...O8 <sup>iii</sup>     | 1.84 | 2.732(2)  | 169 |
| O2–H2B...O7                    | 1.91 | 2.810(2)  | 168 |
| N3–H3A...O6 <sup>iv</sup>      | 2.18 | 3.031(2)  | 169 |
| N3–H3B...O3 <sup>v</sup>       | 2.60 | 3.342(3)  | 145 |
| N3–H3B...O4 <sup>ii</sup>      | 2.53 | 3.283(2)  | 146 |
| O3–H3C...O10 <sup>vi</sup>     | 1.87 | 2.732(2)  | 166 |
| O3–H3D...O5 <sup>vii</sup>     | 1.86 | 2.737(2)  | 167 |
| O4–H4A...O5                    | 1.83 | 2.742(2)  | 170 |
| O4–H4B...O10 <sup>viii</sup>   | 1.89 | 2.780(2)  | 164 |
| O9–H9...N2 <sup>viii</sup>     | 1.89 | 2.794(2)  | 174 |
| O9–H9A...O6                    | 1.88 | 2.762(2)  | 169 |
| O10–H10...O7                   | 1.85 | 2.781(2)  | 175 |
| O10–H10A...O8 <sup>vi</sup>    | 1.78 | 2.708(2)  | 167 |
| Compound <b>4</b> <sup>b</sup> |      |           |     |
| N2–H2B...O1 <sup>i</sup>       | 2.24 | 3.057(11) | 158 |
| N2–H2A...O5                    | 2.70 | 3.391(10) | 138 |
| O5...O4                        | -    | 2.677(11) | -   |
| O3...O5 <sup>ii</sup>          | -    | 2.888(7)  | -   |

A= acceptor; D= donor.

<sup>a</sup> Symmetry codes for **1–3**: (i)  $I-x, I-y, I-z$ ; (ii)  $-x, I-y, I-z$ ; (iii)  $-I+x, y, z$ ; (iv)  $I-x, -y, I-z$ ; (v)  $x, -I+y, I+z$ ; (vi)  $I-x, I-y, -z$ ; (vii)  $I-x, 2-y, -z$ ; (viii)  $x, I+y, z$ . <sup>b</sup>For **4**: (i)  $I/2-x, -1/2+y, I-z$ ; (ii)  $I/2-x, 1/2+y, I-z$ .

### Far-infrared spectra of 1–3

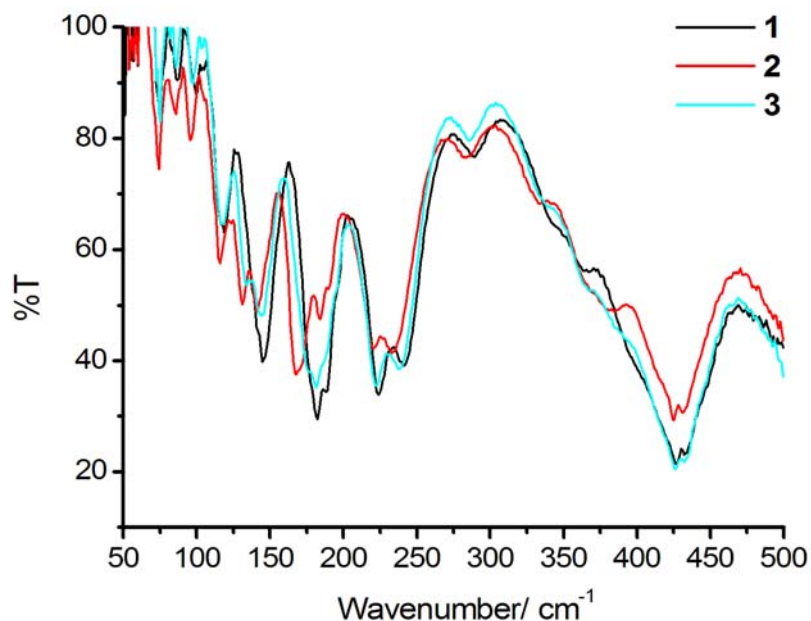

The far-IR spectrum of **3** almost shows close resemblance to the spectrum of **1**, especially in the range of 160–250 cm<sup>-1</sup>, where the deformations of N–M–N and the asymmetric stretching vibrations of M–N are expected.<sup>a</sup> These low-frequency modes are sensitive to metal-ion mass and provide a clue to metal-site preference. This result strongly suggests that the Co(II) ion in **3** is accommodated in [M(H<sub>2</sub>O)<sub>4</sub>(ampyz)<sub>2</sub>]<sup>2+</sup> unit rather than [M(H<sub>2</sub>O)<sub>6</sub>]<sup>2+</sup> unit, and supports the X-ray structure of [Co(H<sub>2</sub>O)<sub>4</sub>(ampyz)<sub>2</sub>][Fe(H<sub>2</sub>O)<sub>6</sub>](SO<sub>4</sub>)<sub>2</sub>(H<sub>2</sub>O)<sub>2</sub> for **3**.

<sup>a</sup> **Table.** IR-active vibrational modes of  $[\text{Fe}(\text{ampyz})_2(\text{H}_2\text{O})_4]^{2+}$  complex calculated by Gaussian03.<sup>b</sup>

| Vibrational mode                              | Wavenumber (cm <sup>-1</sup> ) | IR intensity (a.u.) |
|-----------------------------------------------|--------------------------------|---------------------|
| O–Fe–O def                                    | 97                             | 5.44                |
|                                               | 112                            | 12.30               |
| N–Fe–N def                                    | 166                            | 1.50                |
|                                               | 173                            | 8.59                |
|                                               | 179                            | 5.69                |
| Fe–N stretch                                  | 223                            | 1.35                |
|                                               | 227                            | 1.40                |
| Fe–O stretch                                  | 316                            | 4.05                |
| H <sub>2</sub> O twist + ampyz def            | 390                            | 16.85               |
| H <sub>2</sub> O twist + NH <sub>2</sub> rock | 400                            | 48.50               |
| H <sub>2</sub> O wagg + ampyz def             | 436                            | 50.98               |
| H <sub>2</sub> O wagg + NH <sub>2</sub> twist | 469                            | 140.96              |
|                                               | 483                            | 271.70              |
| H <sub>2</sub> O rock                         | 538                            | 374.91              |

All assignments are in the usual ranges of vibrational frequencies of aqua and pyridine complexes.<sup>†</sup>

<sup>b</sup>The vibrational assignments were performed on high-spin  $[\text{Fe}(\text{ampyz})_2(\text{H}_2\text{O})_4]^{2+}$  ( $S=2$ ) with the Gaussian 03 program suite<sup>‡</sup> where the effective core potential (ECP) basis set CEP-121G was used with the hybrid density functional B3PW91.

## References

<sup>†</sup> (a) K. Nakamoto, *Infrared and Raman Spectra of Inorganic and Coordination Compounds*, 5th ed., Wiley, New York, 1997. (b) A. A. Jarz cki, A. D. Anbar and T. G. Spiro. *J. Phys. Chem. A.*, 2004, **108**, 2726.

<sup>‡</sup> M. J. Frisch, G. W. Trucks, H. B. Schlegel, G. E. Scuseria, M. A. Robb, J. R. Cheeseman, J. A. Montgomery, Jr., T. Vreven, K. N. Kudin, J. C. Burant, J. M. Millam, S. S. Iyengar, J. Tomasi, V. Barone, B. Mennucci, M. Cossi, G. Scalmani, N. Rega, G. A. Petersson, H. Nakatsuji, M. Hada, M. Ehara, K. Toyota, R. Fukuda, J. Hasegawa, M. Ishida, T. Nakajima, Y. Honda, O. Kitao, H. Nakai, M. Klene, X. Li, J. E. Knox, H. P. Hratchian, J. B. Cross, C. Adamo, J. Jaramillo, R. Gomperts, R. E. Stratmann, O. Yazyev, A. J. Austin, R. Cammi, C. Pomelli, J. W. Ochterski, P. Y. Ayala, K. Morokuma, G. A. Voth, P. Salvador, J. J. Dannenberg, V. G. Zakrzewski, S. Dapprich, A. D. Daniels, M. C. Strain, O. Farkas, D. K. Malick, A. D. Rabuck, K. Raghavachari, J. B. Foresman, J. V. Ortiz, Q. Cui, A. G. Baboul, S. Clifford, J. Cioslowski, B. B. Stefanov, G. Liu, A. Liashenko, P. Piskorz, I. Komaromi, R. L. Martin, D. J. Fox, T. Keith, M. A. Al-Laham, C. Y. Peng, A. Nanayakkara, M. Challacombe, P. M. W. Gill, B. Johnson, W. Chen, M. W. Wong, C. Gonzalez, and J. A. Pople, *Gaussian 03*, Revision C.02; Gaussian, Inc.: Wallingford, CT, 2004.



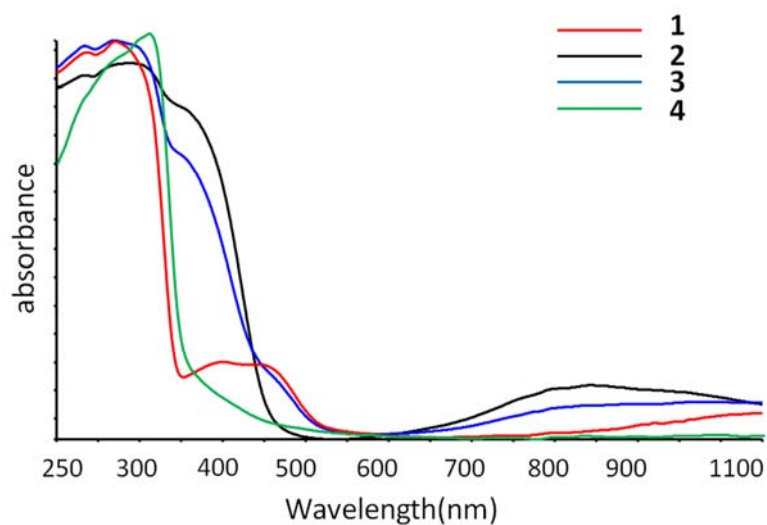

**Fig. S1** UV-vis diffuse reflectance spectra of as-synthesized compounds **1–4**.

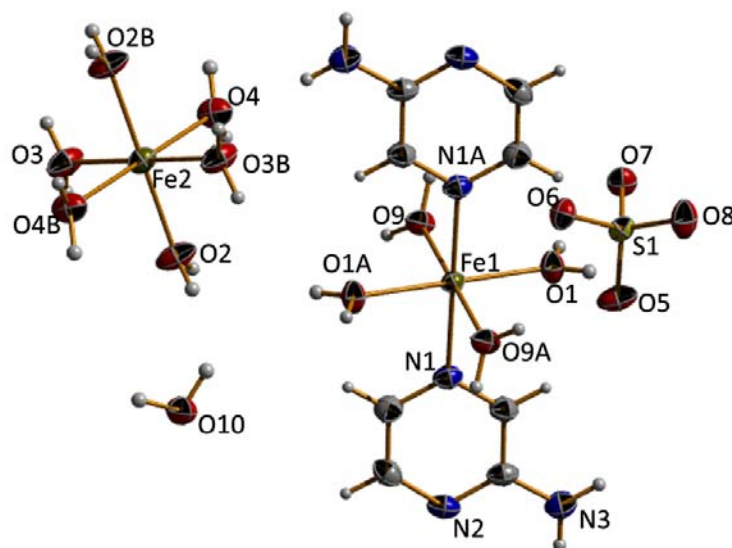

**Fig. S2** Crystal structure and atom labeling scheme of **2**. The ellipsoids are shown at 50% probability level. Atoms labeled with the notation “A” and “B” are symmetry-generated equivalents, (A)  $-x, 1-y, 1-z$ ; (B)  $-x, 2-y, -z$ .

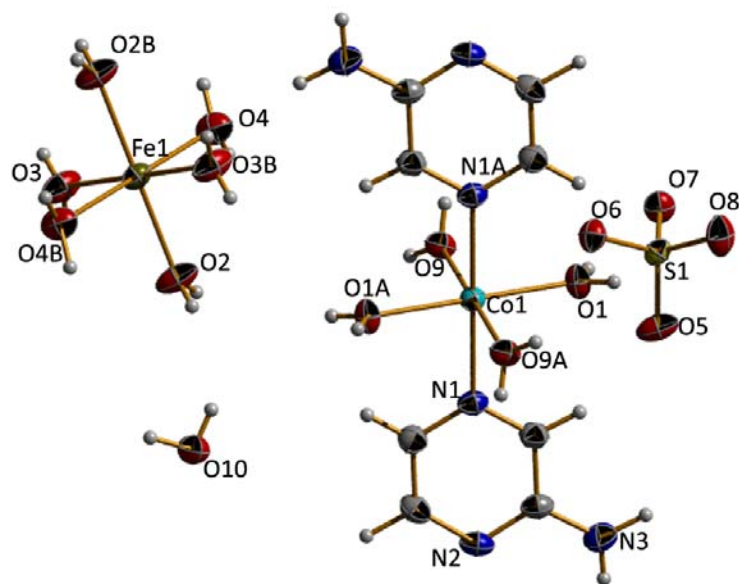

**Fig. S3** Crystal structure and atom labeling scheme of **3**. The ellipsoids are shown at 50% probability level. Atoms labeled with the notation “A” and “B” are symmetry-generated equivalents, (A)  $-x, 1-y, 1-z$ ; (B)  $-x, 2-y, -z$ .

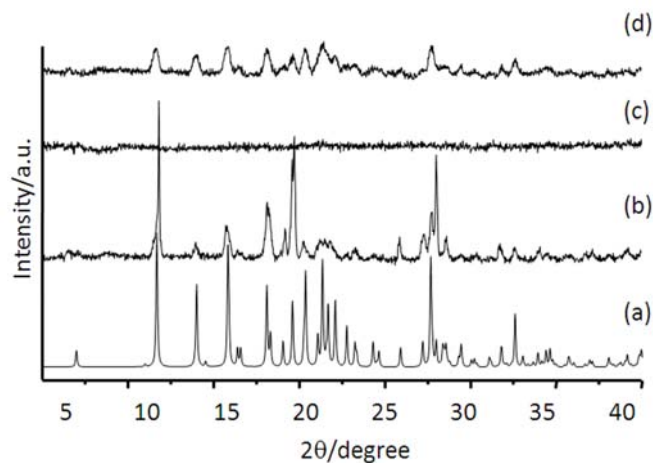

**Fig. S4** XRPD patterns: (a) simulated from single-crystal X-ray data; (b) as-synthesize **2**; (c) the dehydrated form **2A**; (d) the rehydrated form **2'**.

(The elemental analysis for **2'**: Anal. Calcd: C, 13.53; H, 4.38; N, 11.83 %. Found: C,13.72; H, 4.26; N, 12.00%.)

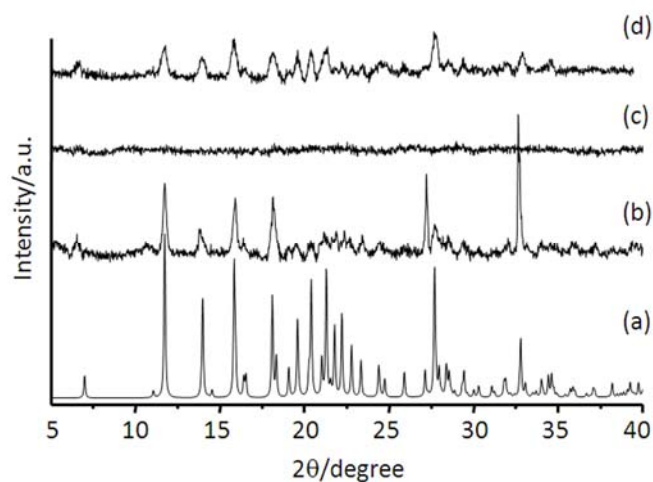

**Fig. S5** XRPD patterns: (a) simulated from single-crystal X-ray data; (b) as-synthesize **3**; (c) the dehydrated form **3A**; (d) the rehydrated form **3'**.

(The elemental analysis for **3'**: Anal. Calcd: C, 13.47; H, 4.80; N, 11.78 %. Found: C,13.12; H, 3.87; N, 12.03%.)

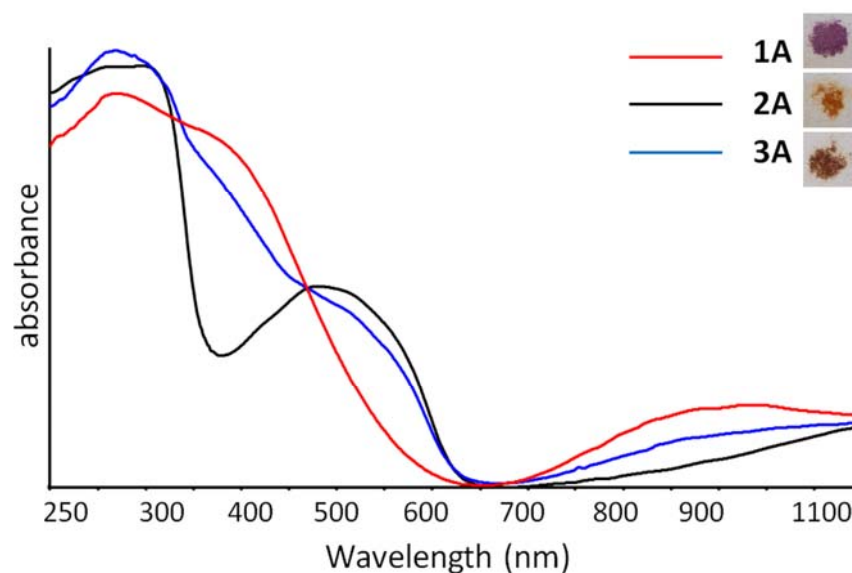

**Fig. S6** UV-vis diffuse reflectance spectra of the dehydrated compounds **1A–3A**, represented together with the colors of their dehydrated samples. The spectrum of **3A** shows the overlap bands between **1A** and **2A** indicating that **3A** is also a hetero-metallic compound.

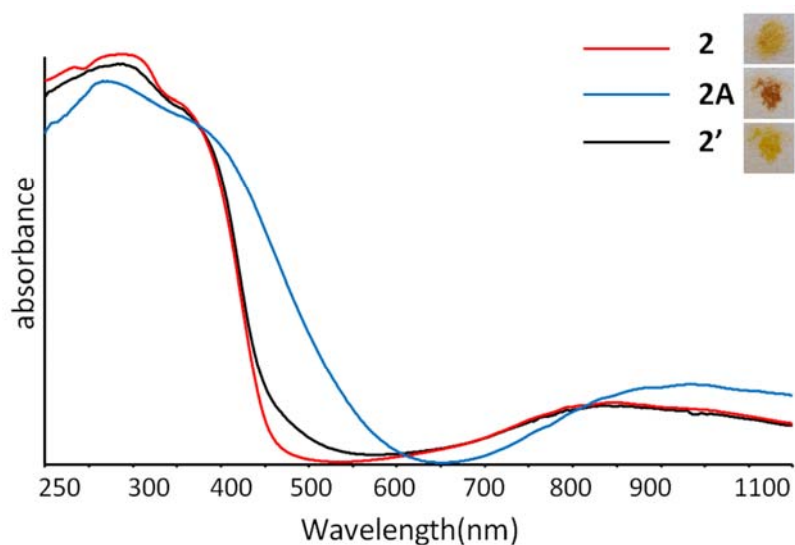

**Fig. S7** The UV-vis diffuse reflectance spectra of as-synthesize **2** (red line), the dehydrated form **2A** (blue line), and the rehydrated form **2'** (black line), represented together with the chromatic changes in bulk samples.

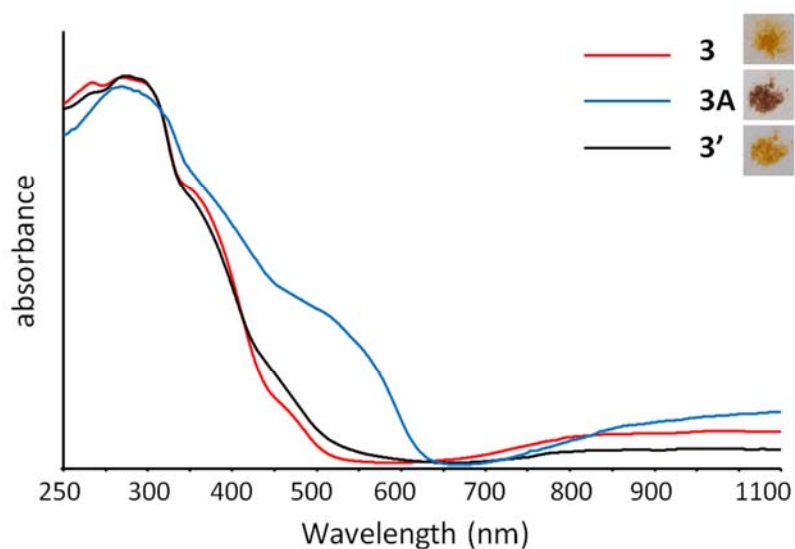

**Fig. S8** The UV-vis diffuse reflectance spectra of as-synthesize **3** (red line), the dehydrated form **3A** (blue line), and the rehydrated form **3'** (black line), represented together with the chromatic changes in bulk samples.
